# Supplementary material for: An automated programmable platform enabling multiplex dynamic stimuli delivery and cellular response monitoring for high-throughput suspension single-cell signaling studies
Source: PubMed Central journal article supplement — Lab Chip. 2015 Jan 22;15(6):1497–507. doi: 10.1039/c4lc01070a (PMC4362087; doi:10.1039/c4lc01070a), 2015-01-22

## Lab on Chip Supplemental Information

### An automated programmable platform enabling multiplex dynamic stimuli delivery and cellular response monitoring for high-throughput single-cell signaling studies

Luye He,<sup>\*a</sup> Ariel Kniss,<sup>\*b</sup> Melissa L. Kemp,<sup>b</sup> Hang Lu<sup>a</sup>

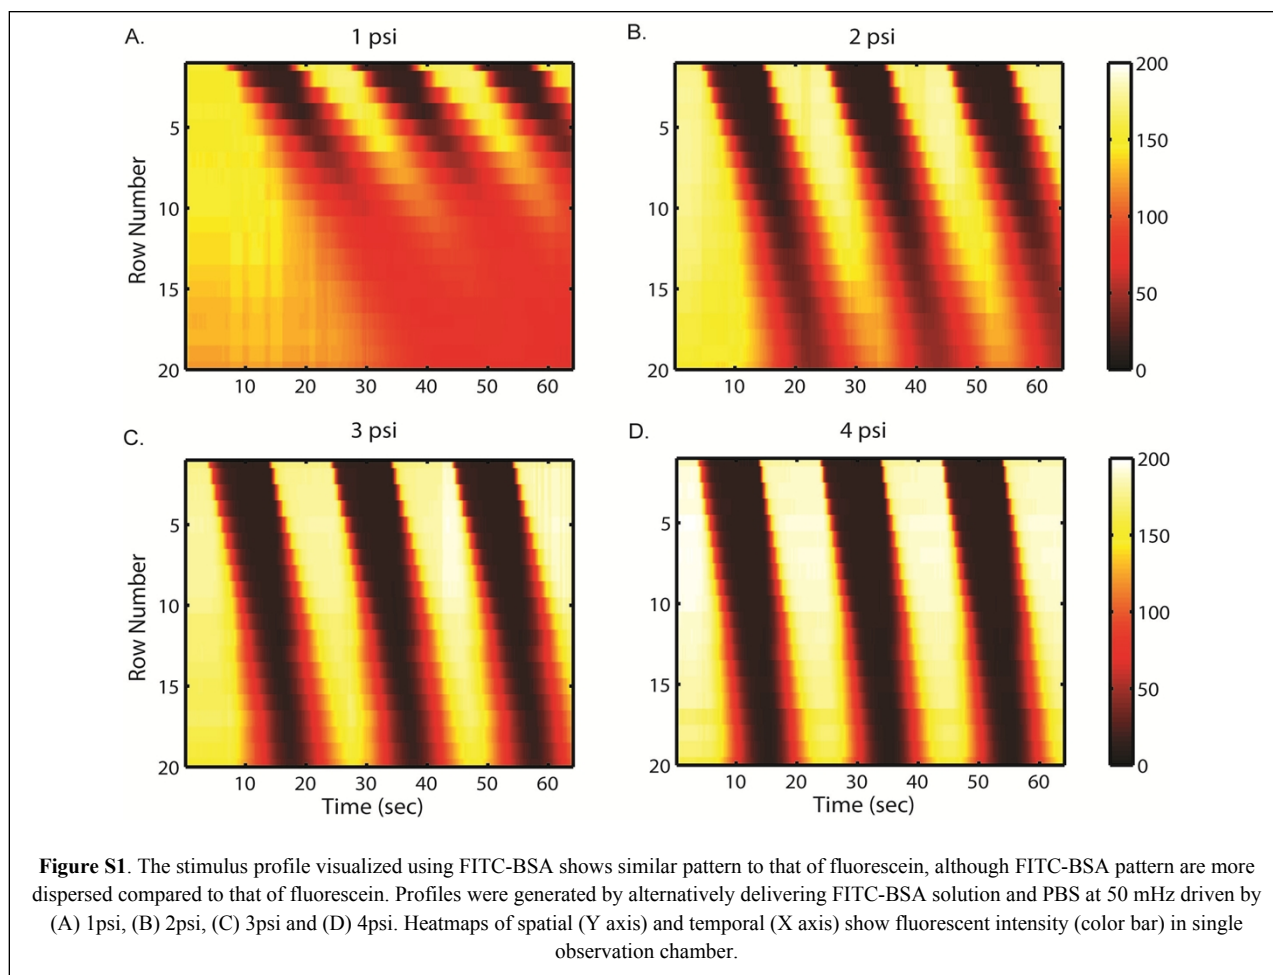

**Table S1.** Summary of effective dispersion analysis for fluorescein and FITC-BSA

| FITC-BSA dispersion       |                                      |                                                                     |                                    |     |      |      |      |  |
|---------------------------|--------------------------------------|---------------------------------------------------------------------|------------------------------------|-----|------|------|------|--|
| Driving Pressure<br>(PSI) | Mean Flow Velocity<br><i>U</i> (m/s) | Effective Dispersion Coefficient<br><i>Deff</i> (m <sup>2</sup> /s) | Rise Time <i>t</i> (sec) for Row # |     |      |      |      |  |
|                           |                                      |                                                                     | 1                                  | 5   | 10   | 15   | 20   |  |
| 1                         | 5.14E-04                             | 5.67E-07                                                            | 1.7                                | 7.8 | 19.4 | 24.5 | 28.6 |  |
| 2                         | 1.29E-03                             | 1.73E-06                                                            | 0.9                                | 3.1 | 7.0  | 9.4  | 12.3 |  |
| 3                         | 1.98E-03                             | 2.82E-06                                                            | 0.7                                | 2.0 | 4.4  | 6.1  | 8.2  |  |
| 4                         | 2.78E-03                             | 4.36E-06                                                            | 0.6                                | 1.4 | 3.2  | 4.4  | 6.0  |  |
| 5                         | 3.48E-03                             | 5.35E-06                                                            | 0.5                                | 1.2 | 2.6  | 3.6  | 4.8  |  |

| Fluorescein dispersion    |                                      |                                                                     |                                    |     |      |      |      |  |
|---------------------------|--------------------------------------|---------------------------------------------------------------------|------------------------------------|-----|------|------|------|--|
| Driving Pressure<br>(PSI) | Mean Flow Velocity<br><i>U</i> (m/s) | Effective Dispersion Coefficient<br><i>Deff</i> (m <sup>2</sup> /s) | Rise Time <i>t</i> (sec) for Row # |     |      |      |      |  |
|                           |                                      |                                                                     | 1                                  | 5   | 10   | 15   | 20   |  |
| 1                         | 5.23E-04                             | 1.47E-07                                                            | 1.1                                | 6.5 | 13.3 | 15.2 | 14.2 |  |
| 2                         | 1.34E-03                             | 1.11E-06                                                            | 0.6                                | 2.7 | 6.0  | 7.9  | 9.4  |  |
| 3                         | 2.20E-03                             | 2.32E-06                                                            | 0.5                                | 1.6 | 3.8  | 5.2  | 6.4  |  |
| 4                         | 2.92E-03                             | 3.61E-06                                                            | 0.4                                | 1.3 | 3.0  | 4.1  | 5.1  |  |
| 5                         | 3.82E-03                             | 5.32E-06                                                            | 0.4                                | 1.0 | 2.2  | 3.2  | 4.1  |  |

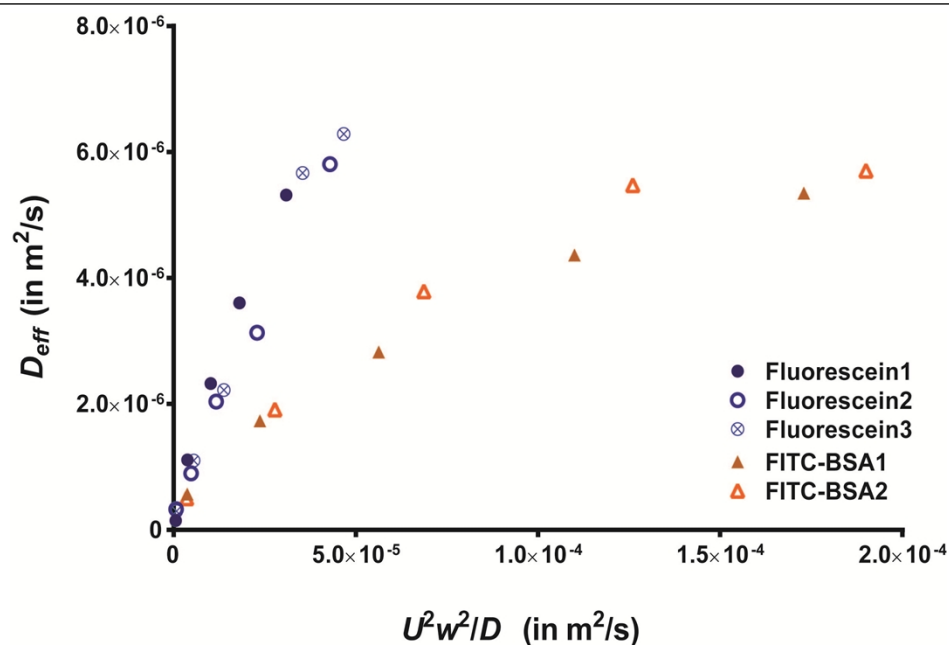

**Figure S2.** The results for effective dispersion analysis are consistent across experiment repeats.

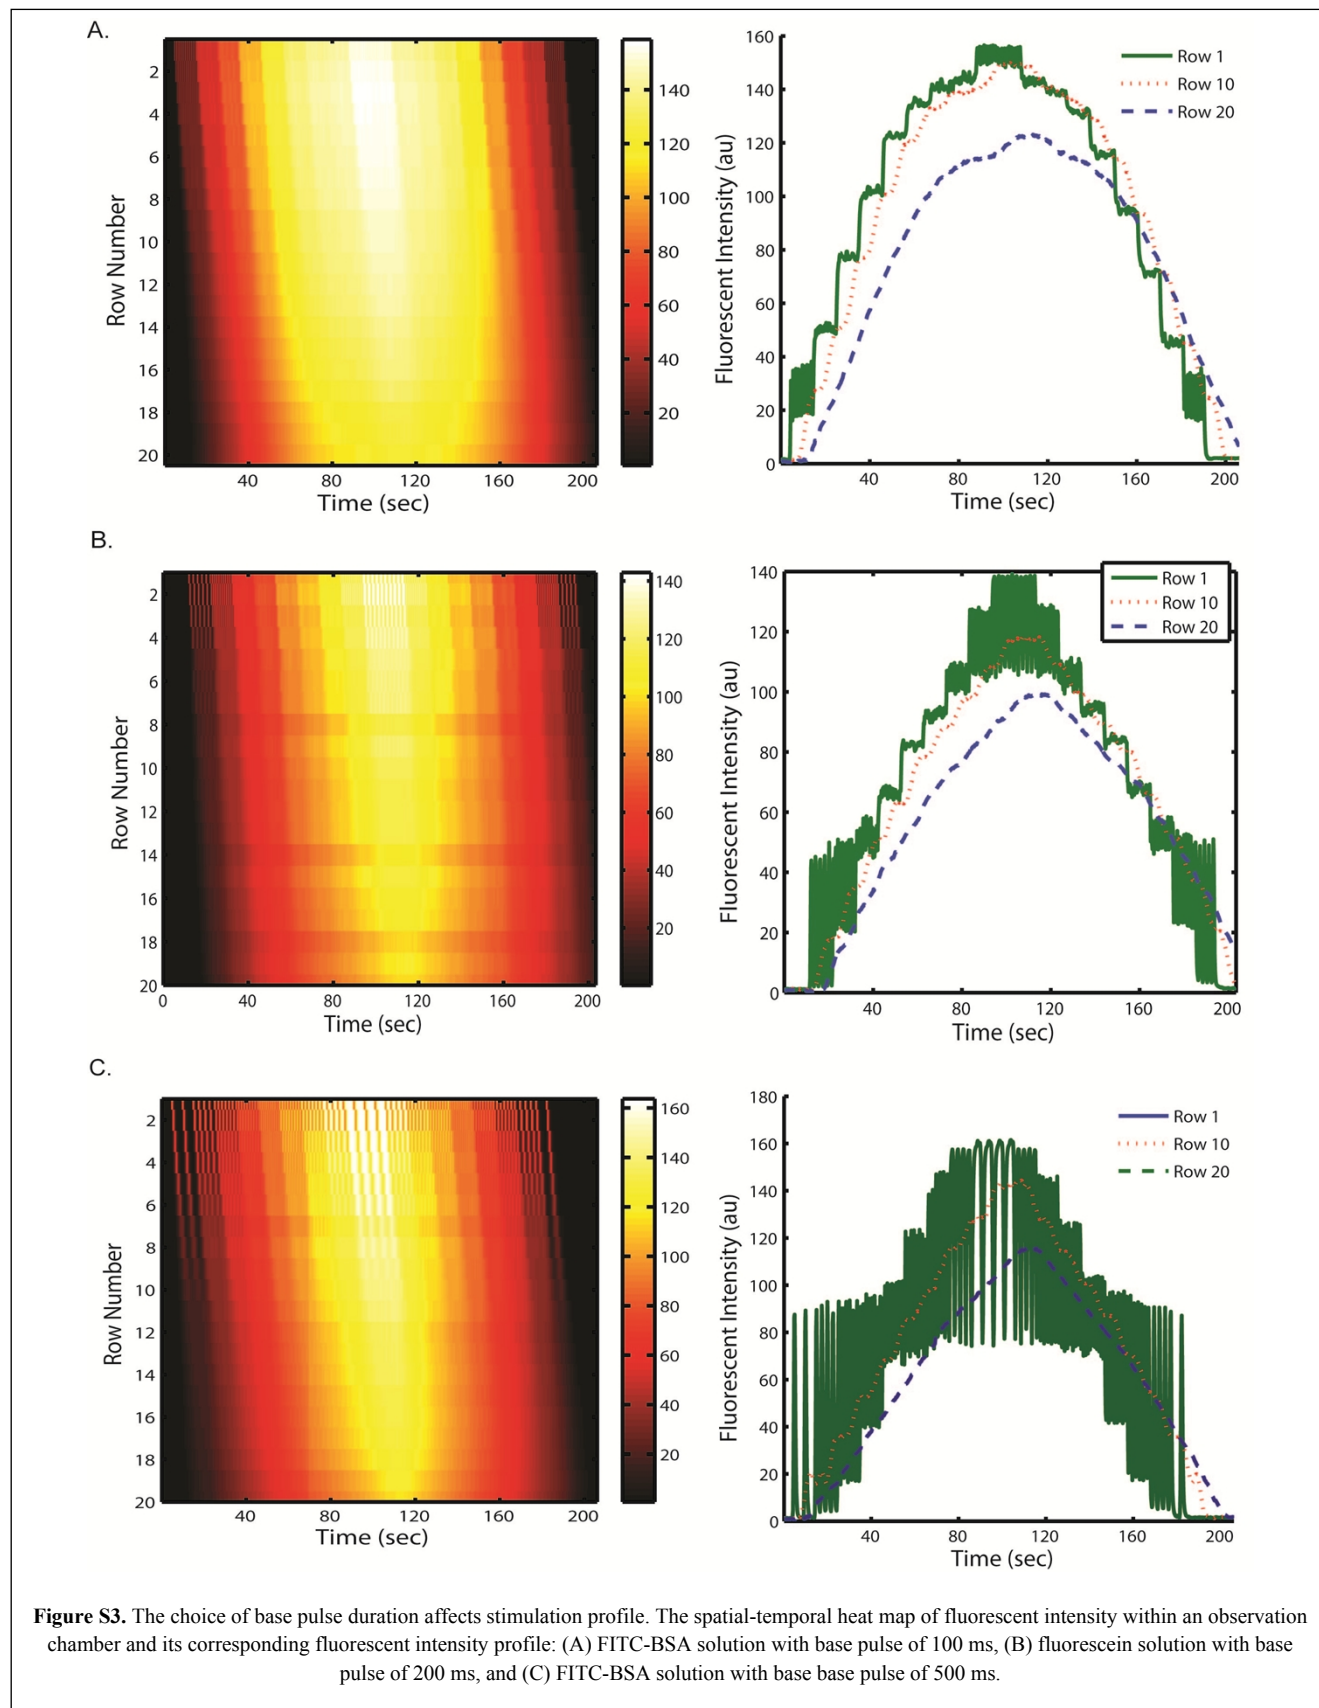

Supplement: LC-015-C4LC01070A-s001.pdf [file LC-015-C4LC01070A-s001.pdf]
